# Supplementary material for: Gut microbiota restoration through fecal microbiota transplantation: a new atopic dermatitis therapy
Source: PubMed Central journal article supplement (PMC8178377; doi:10.1038/s12276-021-00627-6), 2021-05-20
Supplement: 12276_2021_627_MOESM1_ESM.pdf [file 12276_2021_627_MOESM1_ESM.pdf]

1 **Supplementary materials**

2

3 **Fig. S1. Timeline depicting the various steps in the *in vivo* fecal microbiota**  
4 **transplantation (FMT) experiment.** Experimental timeline for FMT from the time of  
5 induction of atopic dermatitis using ovalbumin (OVA) sensitization in mice to analysis.

6

7 **Fig. S2. Taxa level abundance of bacterial taxa in the gut microbiota.** The boxplots reveal  
8 significant differences in the relative abundance of bacteria (a) phylum, (b) family, and (c)  
9 genus among the four experimental groups.

10

11 **Fig. S3. The heatmap of the top 70 bacterial taxa at genus level based on operational**  
12 **taxonomic units (OTUs).** The heatmap reveals increased abundance of *Bacteroidaceae*,  
13 *Lactobacillaceae*, *Odoribacteraceae*, and *Rikenellaceae* families in the Donor, FMT\_1w, and  
14 FMT\_8w groups compared with that in the Before\_FMT group.

15

16 **Fig. S1.**

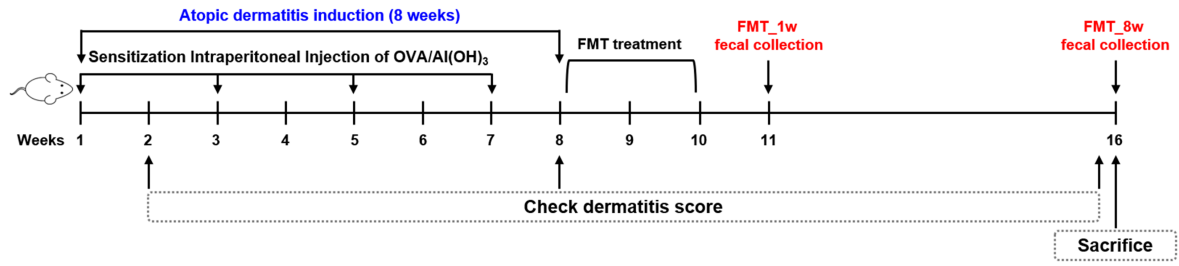

17

18

19 **Fig. S2.**

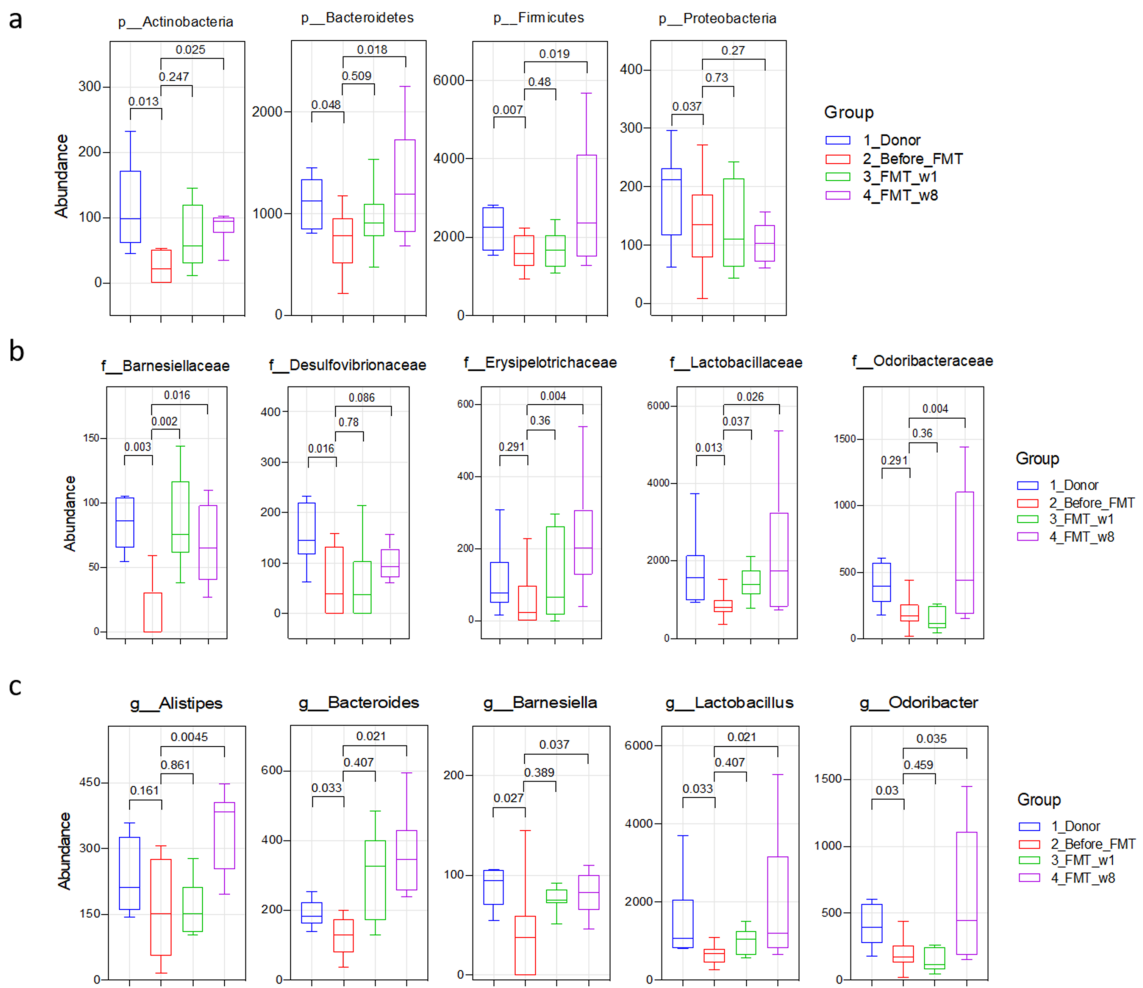

20

21

22 **Fig. S3.**

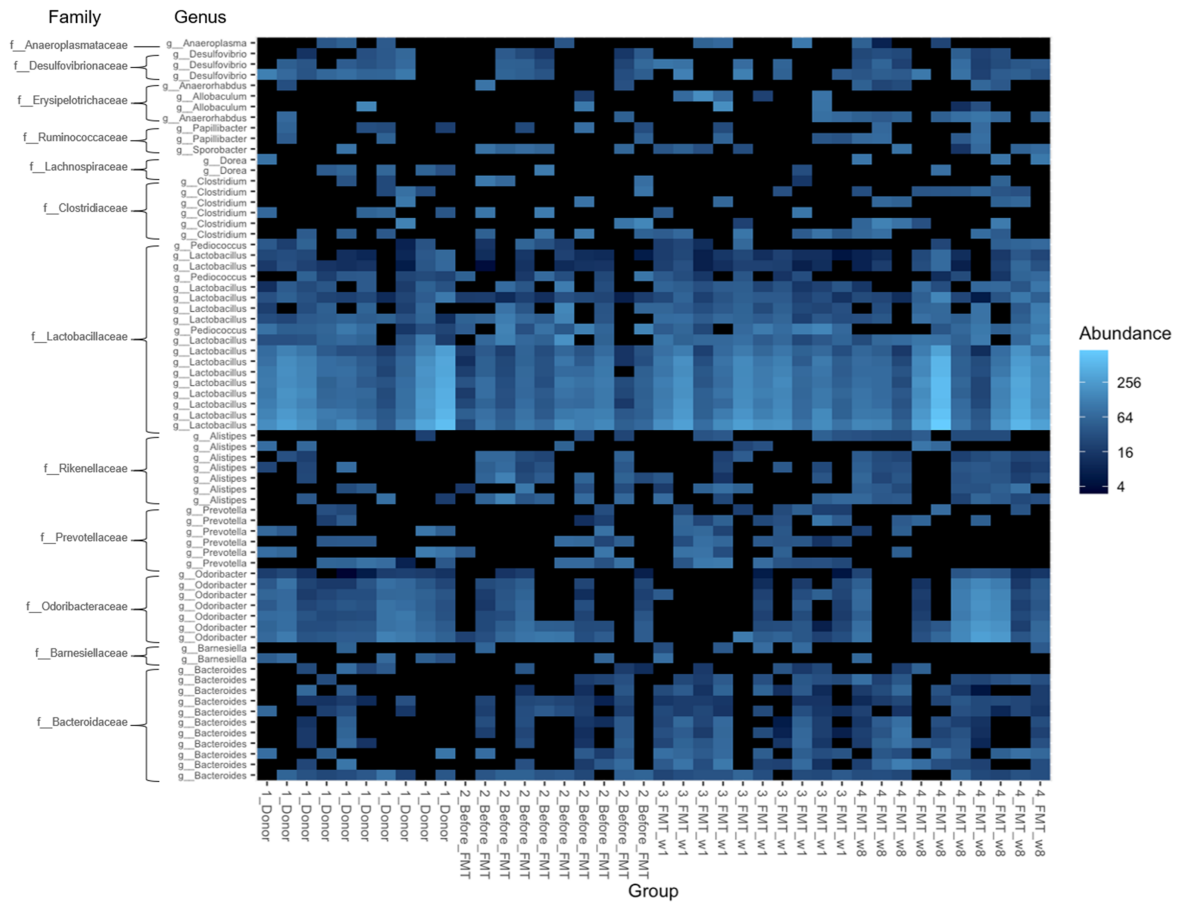

23
